# Supplementary material for: Environmental dynamics since the last glacial in arid Central Asia: evidence from grain size distribution and magnetic properties of loess from the Ili Valley, western China
Source: Copernicus journal article supplement (doi:10.5194/cp-2017-50), 2017-03-27
Supplement: Supplementary file [file cp-2017-50-AC4-supplement.pdf]

## Supplement

Magnetic susceptibility values ( $10^{-8}\text{m}^3\text{kg}^{-1}$ ) of different grain-size fractions

| Sample No. | Grain-size Fractions |                     |                     |                     |                   |
|------------|----------------------|---------------------|---------------------|---------------------|-------------------|
|            | > 63 $\mu\text{m}$   | 63-40 $\mu\text{m}$ | 40-32 $\mu\text{m}$ | 32-20 $\mu\text{m}$ | <20 $\mu\text{m}$ |
| NLK400     | 72                   | 66                  | 86                  | 88                  | <b>98</b>         |
| NLK800     | 67                   | 61                  | 80                  | <b>87</b>           | 85                |
| NLK1108    | 73                   | 78                  | 104                 | 107                 | <b>108</b>        |
| NLK1110    | 75                   | 68                  | 96                  | <b>109</b>          | 105               |
| NLK1400    | 79                   | 83                  | 94                  | 100                 | <b>111</b>        |

Note: Red font represents maximum values in different grain-size fractions.
